# Supplementary material for: Sequence determinants of human microsatellite variability
Source: Springer Nature journal article supplement (doi:10.1186/1471-2164-10-612), 2009-01-01
Supplement: Additional file 6 [file 1471-2164-10-612-s6.pdf]

**Table S6. Spearman's rank correlations between measures of variation across individuals for microsatellites with three tetra-nucleotide STR regions embedded in their sequence**

|                               | Variance in number of repeats |                                         | Range of number of repeats |                                         | Skewness in number of repeats |       | Mean PCR fragment size |       | Mean number of repeats |              | Maximum number of repeats |                                         | Minimum number of repeats |                                         |
|-------------------------------|-------------------------------|-----------------------------------------|----------------------------|-----------------------------------------|-------------------------------|-------|------------------------|-------|------------------------|--------------|---------------------------|-----------------------------------------|---------------------------|-----------------------------------------|
|                               | $\rho$                        | $P$                                     | $\rho$                     | $P$                                     | $\rho$                        | $P$   | $\rho$                 | $P$   | $\rho$                 | $P$          | $\rho$                    | $P$                                     | $\rho$                    | $P$                                     |
| Number of distinct alleles    | <b>0.848</b>                  | <b><math>4.98 \times 10^{-4}</math></b> | <b>0.979</b>               | <b><math>3.24 \times 10^{-8}</math></b> | 0.336                         | 0.285 | 0.308                  | 0.330 | <b>0.602</b>           | <b>0.038</b> | <b>0.771</b>              | <b>0.003</b>                            | 0.312                     | 0.323                                   |
| Variance in number of repeats | -                             | -                                       | <b>0.843</b>               | <b><math>5.72 \times 10^{-4}</math></b> | 0.259                         | 0.417 | 0.203                  | 0.527 | 0.350                  | 0.265        | <b>0.629</b>              | <b>0.028</b>                            | 0.070                     | 0.829                                   |
| Range of number of repeats    | -                             | -                                       | -                          | -                                       | 0.317                         | 0.315 | 0.275                  | 0.387 | <b>0.646</b>           | <b>0.023</b> | <b>0.825</b>              | <b><math>9.45 \times 10^{-4}</math></b> | 0.343                     | 0.275                                   |
| Skewness in number of repeats | -                             | -                                       | -                          | -                                       | -                             | -     | -0.357                 | 0.255 | 0.084                  | 0.795        | 0.280                     | 0.379                                   | 0.042                     | 0.897                                   |
| Mean PCR fragment size        | -                             | -                                       | -                          | -                                       | -                             | -     | -                      | -     | 0.238                  | 0.457        | 0.301                     | 0.342                                   | 0.175                     | 0.586                                   |
| Mean number of repeats        | -                             | -                                       | -                          | -                                       | -                             | -     | -                      | -     | -                      | -            | <b>0.881</b>              | <b><math>1.53 \times 10^{-4}</math></b> | <b>0.862</b>              | <b><math>3.15 \times 10^{-4}</math></b> |
| Maximum number of repeats     | -                             | -                                       | -                          | -                                       | -                             | -     | -                      | -     | -                      | -            | -                         | -                                       | <b>0.687</b>              | <b>0.014</b>                            |
| Minimum number of repeats     | -                             | -                                       | -                          | -                                       | -                             | -     | -                      | -     | -                      | -            | -                         | -                                       | -                         | -                                       |

Spearman's rank correlation coefficients ( $\rho$ ) and their associated  $P$  values are shown for comparisons of the measures of variation across individuals in the HGDP-CEPH data set for the 12 loci with three tetra-nucleotide STR regions embedded in their sequence. No comparisons were performed for di-nucleotide and tri-nucleotide loci with three STR regions embedded in their sequence because of small sample size (3 and 2, respectively). Correlations with  $P < 0.05$  are highlighted in **bold**.
